# Supplementary material for: A density function theory study on the NO reduction on nitrogen doped graphene
Source: Royal Society of Chemistry journal article supplement (doi:10.1039/c4cp02873b), 2014-01-01
Supplement: c4cp02873b2.pdf [file c4cp02873b2.pdf]

## Supporting Information

### **A density function theory study on the NO reduction on nitrogen doped graphene**

Xilin Zhang,<sup>a</sup> Zhansheng Lu,<sup>\*a</sup> Yanan Tang,<sup>b</sup> Zhaoming Fu,<sup>a</sup> Dongwei Ma,<sup>c</sup> and Zongxian Yang<sup>\*a</sup>

*<sup>a</sup> College of Physics and Electronic Engineering, Henan Normal University, Xinxiang, 453007, China*

*<sup>b</sup> Department of Physics and Electronic Science, Zhengzhou Normal University, Zhengzhou, 450044, China*

*<sup>c</sup> School of Physics, Anyang Normal University, Anyang 455000, China.*

\*Author to whom correspondence should be addressed.

Electronic mails: [zslu@henannu.edu.cn](mailto:zslu@henannu.edu.cn) (Z Lu); [yzx@henannu.edu.cn](mailto:yzx@henannu.edu.cn) (Z Yang).

Supporting information 1:

Table S1: The vibrational frequencies of the transition states for the main reaction steps.

| Reaction step                                                          | Vibrational frequencies ( $\text{cm}^{-1}$ )                                                            |
|------------------------------------------------------------------------|---------------------------------------------------------------------------------------------------------|
| $\text{NO} \rightarrow \text{N} + \text{O}$                            | i514.83, 177.39, 257.18, 264.77, 359.79, 53.41, 745.31, 866.05,                                         |
| $(\text{NO})_2 \rightarrow \text{N}_2\text{O} + \text{O}_{\text{ads}}$ | i196.09, 114.14, 146.46, 200.09, 246.53, 415.45, 580.19, 1089.55, 1340.12,<br>1903.21, 2383.35, 2425.07 |
| $\text{O}_{\text{ads}} + \text{NO} \rightarrow \text{NO}_2$            | i72.57, 73.80, 114.80, 138.75, 201.33, 233.71, 664.34, 952.20, 1788.35                                  |

Supporting information 2:

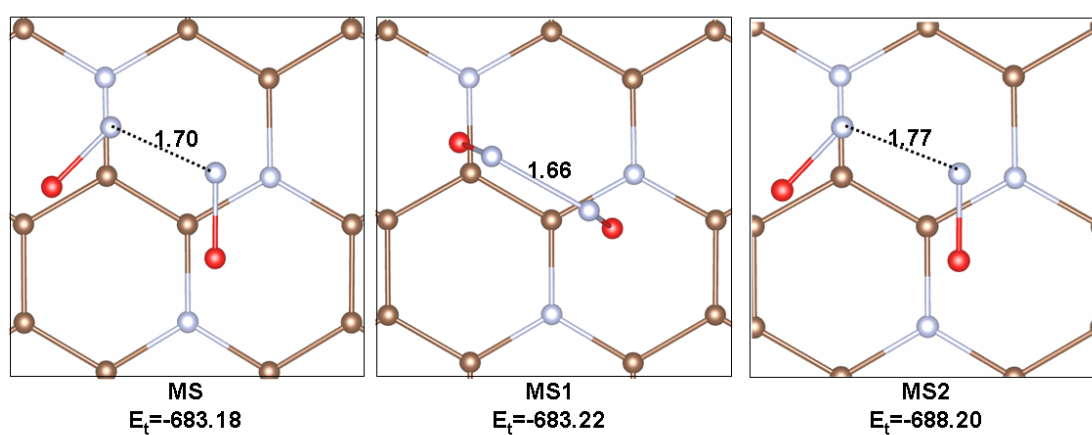

Figure S1: The metastable state structures for the co-adsorption of two NO molecules on the NG support. The  $E_t$  represent the total energy of the system and the MS2 represent the structure with the VdW correction.
